# Supplementary material for: Pathway-based classification of cancer subtypes
Source: PubMed Central journal article supplement (PMC3485163; doi:10.1186/1745-6150-7-21), 2012-07-03
Supplement: 1745-6150-7-21-S1.pdf [file 1745-6150-7-21-S1.pdf]

## Additional file 1.

**Table S1.** (a) Invariant leading edge/Fisher selected genes between the Wang/van de Vijver breast cancer metastasis datasets. Genes listed are in the intersection of the leading edge genes and the Fisher selected genes in the Wang dataset, which are simultaneously in the intersection of same two groups of genes relative to the the van de Vijver dataset.

(b) Invariant leading edge/Fisher selected genes between the UNC and BI ovarian survival datasets. Genes listed are in the intersection of the leading edge genes and the Fisher selected genes in the UNC dataset, and simultaneously in the intersection of the same two groups of genes relative to the BI dataset. The enriched pathway through which each gene is selected is listed below the gene, and a summary of the gene/pathway roles is listed. Red indicates a pathway enriched for metastatic breast cancer or short survival ovarian cancer, while blue indicates enriched pathways in non-metastatic breast cancer and long survival time of ovarian cancer.

- a) Genes related with breast cancer metastasis between Wang and van de Vijver data sets  
(pathway colors: red for enrichment in metastatic cancers, black in non-metastatic cancers)

| Gene symbol<br>Pathway information      | Full name                                                 | Summary                                                                                                                                                    |
|-----------------------------------------|-----------------------------------------------------------|------------------------------------------------------------------------------------------------------------------------------------------------------------|
| CCNB2<br>CELL_CYCLE                     | Cyclin B2                                                 | Involved with proliferating cells through binding to and activating p34[1]                                                                                 |
| PSMA7<br>PROTEASOME                     | Proteasome subunit, alpha-type, 7                         | Differentially expressed and associated with metastasis to the liver in colorectal cancer [2]                                                              |
| CCNE2<br>CELL_CYCLE                     | Cyclin E2                                                 | Induced oncogene, elevated in tumor-derived cells[3]                                                                                                       |
| PTTG1<br>CELL_CYCLE                     | Pituitary tumor-transforming gene1                        | Prognostic marker for breast cancer[4] and colon cancer[5]. Overexpressed in most cancers; its levels correlate with tumor development and size[6,7].      |
| TPI1<br>FRUCTOSE_AND_MANNOSE_METABOLISM | Triosephosphate isomerase 1                               | anti-drug resistance agent in gastric cancer cells[8]                                                                                                      |
| RRM2<br>PYRIMIDINE_METABOLISM           | Ribonucleotide reductase, M2                              | Required for cell division, also found to speed up cell proliferation and progression after knockdown; overexpressed in pancreatic adenocarcinoma cells[9] |
| MAD2L1                                  | Mitotic arrest-deficient 2, S. Cerevisiae, homolog-like 1 | Overexpressed in breast cancer and ovarian cancer; MAD2 expression significant in mitotic                                                                  |

|                                        |                                                                       |                                                                                                                                                                                                          |
|----------------------------------------|-----------------------------------------------------------------------|----------------------------------------------------------------------------------------------------------------------------------------------------------------------------------------------------------|
| <b>CELL_CYCLE</b>                      |                                                                       | checkpoint control in ovarian cancer cells,[10,11,12]<br>Dysfunction may lead to malignancy or cell degeneration. A checkpoint in tumorigenesis, overexpressed in several tumor types; targets E2F [13]. |
| BUB1B                                  | Budding uninhibited by benzimidazoles1, S. Cerevisiae homolog of beta | Mutations identified in somatic and germline transition of colorectal cancer cell lines; overexpressed 80% in breast cancer tissues, involved in spindle damage checkpoint[10]                           |
| <b>CELL_CYCLE</b>                      |                                                                       |                                                                                                                                                                                                          |
| SQLE                                   | Squalene epoxidase                                                    | Overexpressed in breast cancer and significantly inversely related to distant metastasis-free survival in stage I/II breast cancer[14]                                                                   |
| <b>BIOSYNTHESIS_OF_STEROIDS</b>        |                                                                       |                                                                                                                                                                                                          |
| E2F1                                   | E2F transcription factor 1                                            | Levels strongly related with breast cancer outcome[15], melanoma progression and metastasis[16]                                                                                                          |
| <b>CELL_CYCLE</b>                      |                                                                       |                                                                                                                                                                                                          |
| NP                                     | Nucleoside phosphorylase                                              |                                                                                                                                                                                                          |
| <b>PYRIMIDINE_METABOLISM</b>           |                                                                       |                                                                                                                                                                                                          |
| PSMB5                                  | Proteasome subunit, beta type5                                        |                                                                                                                                                                                                          |
| <b>PROTEASOME</b>                      |                                                                       |                                                                                                                                                                                                          |
| TSTA3                                  | Tissue specific transplantation antigen P35B                          | Conserved gene for several breast cancer subtypes [17]                                                                                                                                                   |
| <b>FRUCTOSE_AND_MANNOSE_METABOLISM</b> |                                                                       |                                                                                                                                                                                                          |

b) Genes related with ovarian cancer survival time (pathway colors: red for enrichment in metastatic cancers, blue in non-metastatic cancers)

| Gene symbol                                   | Full name                                            | Summary                                                                                                                                    |
|-----------------------------------------------|------------------------------------------------------|--------------------------------------------------------------------------------------------------------------------------------------------|
| <b>Pathway information</b>                    |                                                      |                                                                                                                                            |
| <b>POLR1D</b>                                 | Polymerase (RNA) II (DNA directed) polypeptide D     | Discriminator for late stage colon cancer[18]                                                                                              |
| <b>RNA_POLYMERASE</b>                         |                                                      |                                                                                                                                            |
| ID4                                           | Inhibitor of DNA binding 4                           | Regulator of BRCA1 expression[19]; putative tumor suppressor in human leukemia[20]; inhibitor of BRCA1 in breast cancer ovarian cancer[21] |
| [22]                                          |                                                      |                                                                                                                                            |
| <b>EDAR</b>                                   | Ectodysplasin A receptor                             | Encodes a member of the tumor necrosis factor receptor family (Entrez)                                                                     |
| <b>CYTOKINE_CYTOKINE_RECEPTOR_INTERACTION</b> |                                                      |                                                                                                                                            |
| <b>BMPR2</b>                                  | Bone morphogenetic protein receptor, type II         | Pulmonary arterial hypertension[23]                                                                                                        |
| <b>TGF_BETA_SIGNALING_PATHWAY</b>             |                                                      |                                                                                                                                            |
| <b>HLA-DOA</b>                                | Major histocompatibility complex, class II, DO alpha | Related with B-cell malignancies [24]                                                                                                      |
| <b>CELL_ADHESION_MOLECULES</b>                |                                                      |                                                                                                                                            |

| <u>TYPE_1_DIABETES_MELLITUS</u>                        |                                         |                                                                                                                             |
|--------------------------------------------------------|-----------------------------------------|-----------------------------------------------------------------------------------------------------------------------------|
| DPYSL3<br>Ovarian cancer module                        | Dihydropyrimidinase-like 3              | Related with juvenile pilocytic astrocytomas (JPA), brain tumor grade 1[25]                                                 |
| ANXA4<br>Ovarian cancer module                         | Annexin A4                              | Related with clear cell ovarian tumor chemotherapy resistance[26]                                                           |
| CXCL9<br><u>CYTOKINE_CYTOKINE_RECEPTOR_INTERACTION</u> | Chemoline (C-X-C motif) ligand 9        | breast cancer-related gene[22]                                                                                              |
| MYLK<br>Ovarian cancer module                          | Myosin light chain kinase (MLCK)        | Inhibiting myosin light chain kinase retards the growth of mammary and prostate cancer cells[27]; breast cancer related[28] |
| FBXL7<br>Ovarian cancer module                         | F-box and leucine-rich repeat protein 7 | Breast cancer related [29]                                                                                                  |
| TBL1X<br><u>WNT_SIGNALING_PATHWAY</u>                  | Transfucin (beta)-like 1X-linked        | Related to endometrial carcinogenesis[30]                                                                                   |
