# Supplementary material for: Pathway-based classification of cancer subtypes
Source: PubMed Central journal article supplement (PMC3485163; doi:10.1186/1745-6150-7-21), 2012-07-03
Supplement: 1745-6150-7-21-S2.pdf [file 1745-6150-7-21-S2.pdf]

## Additional file 2.

**Table S2.** Remaining common enriched pathways between two cohorts (cancer-related pathways are listed in table II of the main paper). First part of the table lists the common enriched pathways between the BI and UNC data sets, associated with ovarian cancer survival. Second part of the table presents common enriched pathways associated with metastatic breast cancer between the van de Vijver and Wang data sets. Red coloring represents enriched pathways in short (versus long) survival for ovarian cancer, and for metastasis in breast cancer, and blue coloring represents enriched pathways in long survival and non-metastasis, respectively. Asterisks (\*) indicate pathways also distinguished in the Dressman et al [31] study.

| Common pathways for two ovarian survival data sets |                                          |                                                                                                                |
|----------------------------------------------------|------------------------------------------|----------------------------------------------------------------------------------------------------------------|
| Enriched pathway                                   |                                          | Function of pathway                                                                                            |
| Enriched Pathways in long survival time            | <b>HSA04940_TYPE_1_DIABETES_MELLITUS</b> | Includes human leukocyte antigen (HLA) genes, related to immune system function and protection against cancer, |
|                                                    | HSA04514_CELL_ADHESION_MOLECULES* [32]   | Known to interfere with cellular detachment and cancer metastasis, related to cancer invasion and metastasis.  |
|                                                    | HSA05217_BASAL_CELL_CARCINOMA            |                                                                                                                |
|                                                    | HSA04916_MELANOGENESIS                   |                                                                                                                |
|                                                    | HSA03030_DNA_POLYMERASE[33]              | Functions to replicate DNA, targeting DNA damage agent which cause cell cycle arrest[33] .                     |
|                                                    | HSA04310_WNT_SIGNALING_PATHWAY*          | Includes oncogenes and tumor suppressors[34];significantly deregulated in ovarian cancer[35]                   |

|                                          |                                                         |                                                                                                                                                                                                    |
|------------------------------------------|---------------------------------------------------------|----------------------------------------------------------------------------------------------------------------------------------------------------------------------------------------------------|
|                                          | <b>HSA04340_HEDGEHOG_SIGNALING_PATHWAY*</b>             | Crucial role in tumorigenesis[36]                                                                                                                                                                  |
|                                          | HSA04612_ANTIGEN_PROCESSING_AND_PRESENTATION*           | Biological process for preparing antigens for presentation to immune system cells.                                                                                                                 |
|                                          | HSA04350_TGF_BETA_SIGNALING_PATHWAY*                    | Affects tumorigenesis, either negatively or positively[37].                                                                                                                                        |
|                                          | HSA00251_Glutamate_Metabolism                           |                                                                                                                                                                                                    |
|                                          | <b>HSA04060_CYTOKINE_CYTOKINE_RECEPTOR_INTERACTION*</b> | Involves cytokines which facilitate invasion and metastasis and also function to inhibit tumor progression[38] .                                                                                   |
|                                          | <b>Ovarian_cancer module (Stanford)</b>                 | Curated ovarian cancer-related gene set from Stanford study [39]                                                                                                                                   |
| Enriched pathways in short survival time | HSA03020_RNA_POLYMERASE                                 | Elevated levels of RNA polymerase products appear in tumor cells[40] .                                                                                                                             |
|                                          | HSA01032_GLYCAN_STRUCTURES_DEGRADATION                  | N-linked glycan is generated by tumor cells at high levels and plays an important role in cell-cell communication.                                                                                 |
|                                          | HSA00220_UREA_CYCLE_AND_METABOLISM_OF_AMINO_GROUPS      |                                                                                                                                                                                                    |
|                                          | HSA01031_GLYCAN_STRUCTURES_BIOSYNTHESIS_2*              |                                                                                                                                                                                                    |
|                                          | HSA00903_LIMONENE_AND_PINENE_DEGRADATION                |                                                                                                                                                                                                    |
|                                          | HSA00920_SULFUR_METABOLISM                              | Constituent of a number of essential cellular processes such as biosynthesis or transfer of electrons                                                                                              |
|                                          | <b>Ovarian_Schwartz</b>                                 | Curated ovarian gene set distinguishes clear cell from other poor-prognosis ovarian cancers (stage III and stage IV)[41]; one of 5 additional curated ovarian-related gene sets used in this paper |
|                                          | <b>Ovarian_Schaner</b>                                  | Clear cell carcinoma predictor from other ovarian epithelial cancers[42];one of 5 additional curated ovarian-related gene sets.                                                                    |

|                                                                                          |                     |
|------------------------------------------------------------------------------------------|---------------------|
| Common pathways for metastasis & non-metastasis between van de Vijver and Wang data sets |                     |
| Enriched pathway                                                                         | Function of pathway |

|                                      |                                                        |                                                                                                                                         |
|--------------------------------------|--------------------------------------------------------|-----------------------------------------------------------------------------------------------------------------------------------------|
| Enriched pathways in non-metastasis  | <b>HSA04940_TYPE_1_DIABETES_MELLITUS</b>               | Includes human leukocyte antigen (HLA), related with immune system function to protect against cancer and mediate autoimmune disease.   |
|                                      | HSA04640_HEMATOPOIETIC_CELL_LINEAGE                    | Crucial function of self-renewal in both stem cells and cancer cells [43]                                                               |
|                                      | HSA04610_COMPLEMENT_AND_COAGULATION_CASCADES           | Inhibits lung cancer metastasis in animal studies[44]; part of innate immune system and an effector of antibody-mediated immunity [45]. |
|                                      | <b>HSA04060_CYTOKINE_CYTOKINE_RECEPTOR_INTERACTION</b> | Cancer cells respond cytokines which facilitate invasion and metastasis and also function to inhibit tumor progression[38]              |
|                                      | <b>HSA04340_HEDGEHOG_SIGNALING_PATHWAY</b>             | Crucial role in tumorigenesis [36] [46]                                                                                                 |
| Enriched pathways in Metastasis      | HSA00051_FRUCTOSE_AND_MANNOSE_METABOLISM               |                                                                                                                                         |
|                                      | HSA04110_CELL_CYCLE (cancer)                           | Related with cell growth and cell death                                                                                                 |
|                                      | HSA00100_BIOSYNTHESIS_OF_STEROIDS (cancer)             | Found in metastatic tissue [47], and related with feminizing syndromes [48]                                                             |
|                                      | HSA03050_PROTEASOME                                    | Degradation of damaged and unneeded proteins                                                                                            |
|                                      | HSA05110_CHOLERA_INFECTION                             |                                                                                                                                         |
|                                      | HSA00240_PYRIMIDINE_METABOLISM                         |                                                                                                                                         |
| HSA00970_AMINOACYL_TRNA_BIOSYNTHESIS |                                                        |                                                                                                                                         |

## References

1. Brandeis M, Rosewell I, Carrington M, Crompton T, Jacobs MA, et al. (1998) Cyclin B2-null mice develop normally and are fertile whereas cyclin B1-null mice die in utero. Proc Natl Acad Sci U S A 95: 4344-4349.
2. Hu XT, Chen W, Zhang FB, Shi QL, Hu JB, et al. (2009) Depletion of the proteasome subunit PSMA7 inhibits colorectal cancer cell tumorigenicity and migration. Oncol Rep 22: 1247-1252.
3. Wu Z, Cho H, Hampton GM, Theodorescu D (2009) Cdc6 and cyclin E2 are PTEN-regulated genes associated with human prostate cancer metastasis. Neoplasia 11: 66-76.
4. Solbach C, Roller M, Fellbaum C, Nicoletti M, Kaufmann M (2004) PTTG mRNA expression in primary breast cancer: a prognostic marker for lymph node invasion and tumor recurrence. Breast 13: 80-81.
5. Heaney AP, Singson R, McCabe CJ, Nelson V, Nakashima M, et al. (2000) Expression of pituitary-tumour transforming gene in colorectal tumours. Lancet 355: 716-719.
6. Saez C, Japon MA, Ramos-Morales F, Romero F, Segura DI, et al. (1999) hpttg is over-expressed in pituitary adenomas and other primary epithelial neoplasias. Oncogene 18: 5473-5476.
7. McCabe CJ, Khaira JS, Boelaert K, Heaney AP, Tannahill LA, et al. (2003) Expression of pituitary tumour transforming gene (PTTG) and fibroblast growth factor-2 (FGF-2) in human pituitary adenomas: relationships to clinical tumour behaviour. Clin Endocrinol (Oxf) 58: 141-150.
8. Wang X, Lu Y, Yang J, Shi Y, Lan M, et al. (2008) Identification of triosephosphate isomerase as an anti-drug resistance agent in human gastric cancer cells using functional proteomic analysis. J Cancer Res Clin Oncol 134: 995-1003.
9. Duxbury MS, Ito H, Zinner MJ, Ashley SW, Whang EE (2004) RNA interference targeting the M2 subunit of ribonucleotide reductase enhances pancreatic adenocarcinoma chemosensitivity to gemcitabine. Oncogene 23: 1539-1548.

10. Yuan B, Xu Y, Woo JH, Wang Y, Bae YK, et al. (2006) Increased expression of mitotic checkpoint genes in breast cancer cells with chromosomal instability. *Clinical Cancer Research* 12: 405-410.
11. Wang Z, Zhao B, Xu Y, Wan Y, Bu D, et al. (2002) [Genealogical research of hereditary nonpolyposis colorectal cancer]. *Zhonghua Wai Ke Za Zhi* 40: 411-413.
12. Wang X, Jin DY, Ng RW, Feng H, Wong YC, et al. (2002) Significance of MAD2 expression to mitotic checkpoint control in ovarian cancer cells. *Cancer Research* 62: 1662-1668.
13. Percy MJ, Myrie KA, Neeley CK, Azim JN, Ethier SP, et al. (2000) Expression and mutational analyses of the human MAD2L1 gene in breast cancer cells. *Genes Chromosomes Cancer* 29: 356-362.
14. Helms MW, Kemming D, Pospisil H, Vogt U, Buerger H, et al. (2008) Squalene epoxidase, located on chromosome 8q24.1, is upregulated in 8q+ breast cancer and indicates poor clinical outcome in stage I and II disease. *Br J Cancer* 99: 774-780.
15. Vuaroqueaux V, Urban P, Labuhn M, Delorenzi M, Wirapati P, et al. (2007) Low E2F1 transcript levels are a strong determinant of favorable breast cancer outcome. *Breast Cancer Research* 9: R33.
16. Alla V, Engelmann D, Niemetz A, Pahnke J, Schmidt A, et al. (2010) E2F1 in melanoma progression and metastasis. *J Natl Cancer Inst* 102: 127-133.
17. Yu K, Lee CH, Tan PH, Tan P (2004) Conservation of breast cancer molecular subtypes and transcriptional patterns of tumor progression across distinct ethnic populations. *Clinical Cancer Research* 10: 5508-5517.
18. Nibbe RK, Markowitz S, Myeroff L, Ewing R, Chance MR (2009) Discovery and scoring of protein interaction subnetworks discriminative of late stage human colon cancer. *Mol Cell Proteomics* 8: 827-845.
19. Beger C, Pierce LN, Kruger M, Marcusson EG, Robbins JM, et al. (2001) Identification of Id4 as a regulator of BRCA1 expression by using a ribozyme-library-based inverse genomics approach. *Proc Natl Acad Sci U S A* 98: 130-135.
20. Yu L, Liu C, Vandeusen J, Becknell B, Dai Z, et al. (2005) Global assessment of promoter methylation in a mouse model of cancer identifies ID4 as a putative tumor-suppressor gene in human leukemia. *Nature Genetics* 37: 265-274.
21. Welsh PL, King MC (2001) BRCA1 and BRCA2 and the genetics of breast and ovarian cancer. *Hum Mol Genet* 10: 705-713.
22. Ruiz-Garcia E, Scott V, Machavoine C, Bidart JM, Lacroix L, et al. (2010) Gene expression profiling identifies Fibronectin 1 and CXCL9 as candidate biomarkers for breast cancer screening. *Br J Cancer* 102: 462-468.
23. Cogan JD, Pauciuolo MW, Batchman AP, Prince MA, Robbins IM, et al. (2006) High frequency of BMP2R2 exonic deletions/duplications in familial pulmonary arterial hypertension. *Am J Respir Crit Care Med* 174: 590-598.
24. van Lith M, van Ham M, Neefjes J (2002) Novel polymorphisms in HLA-DOA and HLA-DOB in B-cell malignancies. *Immunogenetics* 54: 591-595.
25. Wong KK, Chang YM, Tsang YT, Perlaky L, Su J, et al. (2005) Expression analysis of juvenile pilocytic astrocytomas by oligonucleotide microarray reveals two potential subgroups. *Cancer Research* 65: 76-84.
26. Kim A, Enomoto T, Serada S, Ueda Y, Takahashi T, et al. (2009) Enhanced expression of Annexin A4 in clear cell carcinoma of the ovary and its association with chemoresistance to carboplatin. *International Journal of Cancer* 125: 2316-2322.
27. Gu LZ, Hu WY, Antic N, Mehta R, Turner JR, et al. (2006) Inhibiting myosin light chain kinase retards the growth of mammary and prostate cancer cells. *Eur J Cancer* 42: 948-957.
28. Khuon S, Liang L, Dettman RW, Sporn PH, Wysolmerski RB, et al. (2010) Myosin light chain kinase mediates transcellular intravasation of breast cancer cells through the underlying endothelial cells: a three-dimensional FRET study. *J Cell Sci* 123: 431-440.
29. Wang X, Pankratz VS, Fredericksen Z, Tarrell R, Karaus M, et al. (2010) Common variants associated with breast cancer in genome-wide association studies are modifiers of breast cancer risk in BRCA1 and BRCA2 mutation carriers. *Hum Mol Genet* 19: 2886-2897.
30. Boren T, Xiong Y, Hakam A, Wenham R, Apte S, et al. (2008) MicroRNAs and their target messenger RNAs associated with endometrial carcinogenesis. *Gynecologic Oncology* 110: 206-215.

31. Dressman HK, Berchuck A, Chan G, Zhai J, Bild A, et al. (2007) An integrated genomic-based approach to individualized treatment of patients with advanced-stage ovarian cancer. *Journal of Clinical Oncology* 25: 517-525.
32. Behrens J (1993) The role of cell adhesion molecules in cancer invasion and metastasis. *Breast Cancer Res Treat* 24: 175-184.
33. Helleday T, Petermann E, Lundin C, Hodgson B, Sharma RA (2008) DNA repair pathways as targets for cancer therapy. *Nat Rev Cancer* 8: 193-204.
34. Polakis P (2000) Wnt signaling and cancer. *Genes Dev* 14: 1837-1851.
35. Gatliffe TA, Monk BJ, Planutis K, Holcombe RF (2008) Wnt signaling in ovarian tumorigenesis. *International Journal of Gynecological Cancer* 18: 954-962.
36. Rubin LL, de Sauvage FJ (2006) Targeting the Hedgehog pathway in cancer. *Nat Rev Drug Discov* 5: 1026-1033.
37. Wakefield LM, Roberts AB (2002) TGF-beta signaling: positive and negative effects on tumorigenesis. *Curr Opin Genet Dev* 12: 22-29.
38. Dranoff G (2004) Cytokines in cancer pathogenesis and cancer therapy. *Nat Rev Cancer* 4: 11-22.
39. Segal E, Friedman N, Koller D, Regev A (2004) A module map showing conditional activity of expression modules in cancer. *Nature Genetics* 36: 1090-1098.
40. White RJ (2004) RNA polymerase III transcription and cancer. *Oncogene* 23: 3208-3216.
41. Schwartz DR, Kardia SL, Shedden KA, Kuick R, Michailidis G, et al. (2002) Gene expression in ovarian cancer reflects both morphology and biological behavior, distinguishing clear cell from other poor-prognosis ovarian carcinomas. *Cancer Research* 62: 4722-4729.
42. Schaner ME, Ross DT, Ciaravino G, Sorlie T, Troyanskaya O, et al. (2003) Gene expression patterns in ovarian carcinomas. *Molecular Biology of the Cell* 14: 4376-4386.
43. Reya T, Morrison SJ, Clarke MF, Weissman IL (2001) Stem cells, cancer, and cancer stem cells. *Nature* 414: 105-111.
44. Bruggemann LW, Versteeg HH, Niers TM, Reitsma PH, Spek CA (2008) Experimental melanoma metastasis in lungs of mice with congenital coagulation disorders. *J Cell Mol Med* 12: 2622-2627.
45. Markiewski MM, Nilsson B, Ekdahl KN, Mollnes TE, Lambris JD (2007) Complement and coagulation: strangers or partners in crime? *Trends Immunol* 28: 184-192.
46. Taipale J, Beachy PA (2001) The Hedgehog and Wnt signalling pathways in cancer. *Nature* 411: 349-354.
47. Touitou Y, Bogdan A, Auzéby A (1983) Experimental evidence for biosynthesis of steroids in metastatic tissue originating from a primitive adrenocortical carcinoma. *Int J Biochem* 15: 571-573.
48. Dorfman RI, Sharma DC, Southren AL, Gabrilove JL (1965) Biosynthesis of steroids in various tissues related to feminizing syndromes. *Cancer Research* 25: 1125-1128.
